# Supplementary material for: The impact of university freshmen’s mental health on academic performance: an empirical study based on M University in Fujian Province, China
Source: Frontiers journal article supplement (doi:10.3389/fpubh.2024.1483031), 2024-12-13
Supplement: Data_Sheet_1.pdf [file Data_Sheet_1.pdf]

## Supplementary Material

### 中国大学生心理健康量表

**指导语：**以下列出了一些人可能会有的问题，请仔细阅读每一条，然后根据自己最近一个月的实际感觉，选择最符合您的一种情况，并在答题卡的相应位置上用2B 铅笔涂好。其中“没有”涂 1，“偶尔”涂 2，“有时”涂 3，“经常”涂 4，“总是”涂 5。

| 题号 | 题目                                  | 没有<br>1 | 偶尔<br>2 | 有时<br>3 | 经常<br>4 | 总是<br>5 |
|----|-------------------------------------|---------|---------|---------|---------|---------|
| 1  | 头痛或头晕                               |         |         |         |         |         |
| 2  | 浑身软弱无力                              |         |         |         |         |         |
| 3  | 做事情必须反复检查                           |         |         |         |         |         |
| 4  | 不能容忍自己的缺点                           |         |         |         |         |         |
| 5  | 为做事达不到预定目标而烦恼                       |         |         |         |         |         |
| 6  | 不允许出现差错                             |         |         |         |         |         |
| 7  | 无法控制自己重复做某些事，如：不停地检查门是否关好，不断地洗手或数数等 |         |         |         |         |         |
| 8  | 头脑中有不必要的想法或字词盘旋                     |         |         |         |         |         |
| 9  | 感到手或脚沉重                             |         |         |         |         |         |
| 10 | 有困难时没人帮助，会无所适从                      |         |         |         |         |         |
| 11 | 做事不主动                               |         |         |         |         |         |
| 12 | 担心朋友会不理我                            |         |         |         |         |         |
| 13 | 不得不独立做某事的时候，仍希望有人帮助                 |         |         |         |         |         |
| 14 | 觉得很多事情自己处理不好                        |         |         |         |         |         |
| 15 | 没有别人安排，不知道该做什么                      |         |         |         |         |         |
| 16 | 如果老师不布置任务，便不知道该干什么                  |         |         |         |         |         |
| 17 | 怕承担事情的后果                            |         |         |         |         |         |
| 18 | 明知是小事，还是会发火                         |         |         |         |         |         |
| 19 | 想占便宜                                |         |         |         |         |         |
| 20 | 对讨厌的人进行直接攻击                         |         |         |         |         |         |
| 21 | 突发奇想地行事                             |         |         |         |         |         |
| 22 | 忍不住伤害令自己不满的人                        |         |         |         |         |         |
| 23 | 不顾场合大发雷霆                            |         |         |         |         |         |
| 24 | 做事情不考虑后果                            |         |         |         |         |         |
| 25 | 莫名其妙地对别人发火                          |         |         |         |         |         |
| 26 | 怀疑自己有不治之症                           |         |         |         |         |         |
| 27 | 感到很少有人理解自己                          |         |         |         |         |         |
| 28 | 对性的向往有罪恶感                           |         |         |         |         |         |
| 29 | 想骂人                                 |         |         |         |         |         |
| 30 | 听到旁人听不到的声音或看到旁人不能看到的                |         |         |         |         |         |

|    |                 |  |  |  |  |  |
|----|-----------------|--|--|--|--|--|
|    | 东西              |  |  |  |  |  |
| 31 | 手淫后有悔恨感和负罪感     |  |  |  |  |  |
| 32 | 怀疑旁人知道我内心的想法    |  |  |  |  |  |
| 33 | 憎恨周围的人          |  |  |  |  |  |
| 34 | 容易疲乏            |  |  |  |  |  |
| 35 | 感到烦闷、坐立不安       |  |  |  |  |  |
| 36 | 过于敏感            |  |  |  |  |  |
| 37 | 容易紧张            |  |  |  |  |  |
| 38 | 失眠              |  |  |  |  |  |
| 39 | 想到坏得说不出口的事      |  |  |  |  |  |
| 40 | 对将来感到恐惧         |  |  |  |  |  |
| 41 | 感到任何事情都很困难      |  |  |  |  |  |
| 42 | 对一些事情感到提心吊胆     |  |  |  |  |  |
| 43 | 对他人大发脾气         |  |  |  |  |  |
| 44 | 对学习没有兴趣         |  |  |  |  |  |
| 45 | 想偷懒             |  |  |  |  |  |
| 46 | 难以集中精力做事        |  |  |  |  |  |
| 47 | 胸闷              |  |  |  |  |  |
| 48 | 感到生活空虚、无趣       |  |  |  |  |  |
| 49 | 想占便宜            |  |  |  |  |  |
| 50 | 感到自己没有价值        |  |  |  |  |  |
| 51 | 处于高度警觉状态        |  |  |  |  |  |
| 52 | 觉得自己缺乏吸引力       |  |  |  |  |  |
| 53 | 猜疑别人会伤害我        |  |  |  |  |  |
| 54 | 觉得自己是一个失败者      |  |  |  |  |  |
| 55 | 恶心              |  |  |  |  |  |
| 56 | 担心别人瞧不起自己       |  |  |  |  |  |
| 57 | 自己的才能得不到发挥      |  |  |  |  |  |
| 58 | 觉得自己总是给他人带来麻烦   |  |  |  |  |  |
| 59 | 没有人真心关心我        |  |  |  |  |  |
| 60 | 觉得自己无论怎么努力都不会成功 |  |  |  |  |  |
| 61 | 怕别人注意           |  |  |  |  |  |
| 62 | 想骂人             |  |  |  |  |  |
| 63 | 同异性相处时感到害羞      |  |  |  |  |  |
| 64 | 参加聚会感到焦虑        |  |  |  |  |  |
| 65 | 与权威人士谈话感到紧张     |  |  |  |  |  |
| 66 | 有想摔打或破坏东西的冲动    |  |  |  |  |  |
| 67 | 参加小组讨论感到紧张      |  |  |  |  |  |
| 68 | 与陌生人见面就脸红       |  |  |  |  |  |
| 69 | 呼吸有困难           |  |  |  |  |  |
| 70 | 与他人争论不休         |  |  |  |  |  |
| 71 | 沮丧、郁闷           |  |  |  |  |  |
| 72 | 有想打人或伤害他人的冲动    |  |  |  |  |  |

|     |                     |  |  |  |  |  |
|-----|---------------------|--|--|--|--|--|
| 73  | 在人群中感到不自在           |  |  |  |  |  |
| 74  | 容易激动                |  |  |  |  |  |
| 75  | 当别人取得成绩时，很想打击他(她)一下 |  |  |  |  |  |
| 76  | 嫉妒比自己幸运的人           |  |  |  |  |  |
| 77  | 觉得别人爱出风头            |  |  |  |  |  |
| 78  | 感到一阵阵发冷或发热          |  |  |  |  |  |
| 79  | 觉得性行为是可耻的           |  |  |  |  |  |
| 80  | 想到坏得说不出口的事          |  |  |  |  |  |
| 81  | 对异性的好奇使我有罪恶感        |  |  |  |  |  |
| 82  | 感到有人在监视自己，谈论自己      |  |  |  |  |  |
| 83  | 觉得性梦是下流的            |  |  |  |  |  |
| 84  | 感到别人能控制自己思想         |  |  |  |  |  |
| 85  | 想偷懒                 |  |  |  |  |  |
| 86  | 担心自己处女膜破损或性无能       |  |  |  |  |  |
| 87  | 感到别人对自己怀有敌意         |  |  |  |  |  |
| 88  | 怀疑自己的能力             |  |  |  |  |  |
| 89  | 感到没有可以信任的人          |  |  |  |  |  |
| 90  | 别人对我的侮辱让我耿耿于怀       |  |  |  |  |  |
| 91  | 感到别人的善意都是有目的的       |  |  |  |  |  |
| 92  | 别人对我的成绩没有做出恰当的评价    |  |  |  |  |  |
| 93  | 过度关注别人对我的反应         |  |  |  |  |  |
| 94  | 不愿听从别人的意见           |  |  |  |  |  |
| 95  | 生活习惯被打乱，会很生气        |  |  |  |  |  |
| 96  | 做事情必须做得很慢以保证做得正确    |  |  |  |  |  |
| 97  | 性幻想使我不能集中精力学习       |  |  |  |  |  |
| 98  | 感到前途没有希望            |  |  |  |  |  |
| 99  | 对看不惯的人或事，会忍不住去指责    |  |  |  |  |  |
| 100 | 感到压抑                |  |  |  |  |  |
| 101 | 害怕当众说话              |  |  |  |  |  |
| 102 | 对一些无关紧要的事情感到过分忧虑    |  |  |  |  |  |
| 103 | 感到有人要迫害自己           |  |  |  |  |  |
| 104 | 觉得遗精(或月经)是肮脏的       |  |  |  |  |  |

### Chinese College Students Mental Health Scale (English version)

**Instructions:** The following are some issues that individuals may experience. Please read each item carefully and choose the option that best describes your feelings in the past month. Mark your answer on the answer sheet using a 2B pencil. Mark "1" for "None," "2" for "Occasionally," "3" for "Sometimes," "4" for "Often," and "5" for "Always."

| Item No. | Question                                                                                     | None<br>1 | Occasionally<br>2 | Sometimes<br>3 | Often<br>4 | Always<br>5 |
|----------|----------------------------------------------------------------------------------------------|-----------|-------------------|----------------|------------|-------------|
| 1        | Headaches or dizziness                                                                       |           |                   |                |            |             |
| 2        | Feeling weak all over                                                                        |           |                   |                |            |             |
| 3        | Must repeatedly check things                                                                 |           |                   |                |            |             |
| 4        | Cannot tolerate my shortcomings                                                              |           |                   |                |            |             |
| 5        | Worry about not achieving goals                                                              |           |                   |                |            |             |
| 6        | Cannot allow for mistakes                                                                    |           |                   |                |            |             |
| 7        | Uncontrollably repeat actions, like checking if the door is locked, washing hands repeatedly |           |                   |                |            |             |
| 8        | Unnecessary thoughts or words circling in my mind                                            |           |                   |                |            |             |
| 9        | Feel heaviness in hands or feet                                                              |           |                   |                |            |             |
| 10       | Feel helpless when no one helps during difficulties                                          |           |                   |                |            |             |
| 11       | Not proactive in doing things                                                                |           |                   |                |            |             |
| 12       | Worry friends will ignore me                                                                 |           |                   |                |            |             |
| 13       | Even when having to do something independently, wish someone would help                      |           |                   |                |            |             |
| 14       | Feel that I cannot handle many things well                                                   |           |                   |                |            |             |
| 15       | Don't know what to do without others' arrangements                                           |           |                   |                |            |             |
| 16       | If the teacher doesn't assign tasks, don't know what to do                                   |           |                   |                |            |             |
| 17       | Fear of bearing the consequences                                                             |           |                   |                |            |             |
| 18       | Get angry even over small things                                                             |           |                   |                |            |             |
| 19       | Want to take advantage of others                                                             |           |                   |                |            |             |
| 20       | Directly attack people I dislike                                                             |           |                   |                |            |             |

|    |                                                |  |  |  |  |  |
|----|------------------------------------------------|--|--|--|--|--|
| 21 | Act on sudden impulses                         |  |  |  |  |  |
| 22 | Can't help hurting people who displease me     |  |  |  |  |  |
| 23 | Lose my temper regardless of the situation     |  |  |  |  |  |
| 24 | Do things without considering the consequences |  |  |  |  |  |
| 25 | Get angry at others for no reason              |  |  |  |  |  |
| 26 | Suspect I have an incurable disease            |  |  |  |  |  |
| 27 | Feel that few people understand me             |  |  |  |  |  |
| 28 | Feel guilty for sexual thoughts                |  |  |  |  |  |
| 29 | Want to curse others                           |  |  |  |  |  |
| 30 | Hear or see things others cannot               |  |  |  |  |  |
| 31 | Feel guilt and remorse after masturbation      |  |  |  |  |  |
| 32 | Suspect others know my inner thoughts          |  |  |  |  |  |
| 33 | Hate the people around me                      |  |  |  |  |  |
| 34 | Get tired easily                               |  |  |  |  |  |
| 35 | Feel restless and uneasy                       |  |  |  |  |  |
| 36 | Overly sensitive                               |  |  |  |  |  |
| 37 | Easily get nervous                             |  |  |  |  |  |
| 38 | Insomnia                                       |  |  |  |  |  |
| 39 | Think about things too terrible to mention     |  |  |  |  |  |
| 40 | Fear the future                                |  |  |  |  |  |
| 41 | Feel everything is difficult                   |  |  |  |  |  |
| 42 | Feel anxious about certain things              |  |  |  |  |  |
| 43 | Lose my temper at others                       |  |  |  |  |  |
| 44 | Have no interest in studying                   |  |  |  |  |  |
| 45 | Want to be lazy                                |  |  |  |  |  |
| 46 | Difficulty concentrating                       |  |  |  |  |  |
| 47 | Chest tightness                                |  |  |  |  |  |
| 48 | Feel life is empty and meaningless             |  |  |  |  |  |
| 49 | Want to take advantage of others               |  |  |  |  |  |
| 50 | Feel I am worthless                            |  |  |  |  |  |
| 51 | In a state of high alert                       |  |  |  |  |  |

|    |                                                        |  |  |  |  |  |
|----|--------------------------------------------------------|--|--|--|--|--|
| 52 | Feel unattractive                                      |  |  |  |  |  |
| 53 | Suspect others will harm me                            |  |  |  |  |  |
| 54 | Feel like a failure                                    |  |  |  |  |  |
| 55 | Nausea                                                 |  |  |  |  |  |
| 56 | Worry that others look down on me                      |  |  |  |  |  |
| 57 | Feel my talents are not fully utilized                 |  |  |  |  |  |
| 58 | Feel like I am always troubling others                 |  |  |  |  |  |
| 59 | Feel no one genuinely cares about me                   |  |  |  |  |  |
| 60 | Feel like no matter how hard I try, I will not succeed |  |  |  |  |  |
| 61 | Fear others' attention                                 |  |  |  |  |  |
| 62 | Want to curse others                                   |  |  |  |  |  |
| 63 | Feel shy around the opposite sex                       |  |  |  |  |  |
| 64 | Feel anxious at social gatherings                      |  |  |  |  |  |
| 65 | Feel nervous talking to authority figures              |  |  |  |  |  |
| 66 | Impulse to break or destroy things                     |  |  |  |  |  |
| 67 | Feel nervous during group discussions                  |  |  |  |  |  |
| 68 | Blush when meeting strangers                           |  |  |  |  |  |
| 69 | Difficulty breathing                                   |  |  |  |  |  |
| 70 | Argue with others incessantly                          |  |  |  |  |  |
| 71 | Feel depressed                                         |  |  |  |  |  |
| 72 | Impulse to hit or hurt others                          |  |  |  |  |  |
| 73 | Feel uncomfortable in crowds                           |  |  |  |  |  |
| 74 | Easily excited                                         |  |  |  |  |  |
| 75 | Feel the urge to undermine others' success             |  |  |  |  |  |
| 76 | Jealous of those more fortunate than myself            |  |  |  |  |  |
| 77 | Feel others like to show off                           |  |  |  |  |  |
| 78 | Feel sudden chills or heat                             |  |  |  |  |  |
| 79 | Feel that sexual behavior is shameful                  |  |  |  |  |  |
| 80 | Think about things too terrible to mention             |  |  |  |  |  |

|     |                                                              |  |  |  |  |  |
|-----|--------------------------------------------------------------|--|--|--|--|--|
| 81  | Feel guilty for curiosity about the opposite sex             |  |  |  |  |  |
| 82  | Feel someone is watching or talking about me                 |  |  |  |  |  |
| 83  | Feel that sexual dreams are obscene                          |  |  |  |  |  |
| 84  | Feel others can control my thoughts                          |  |  |  |  |  |
| 85  | Want to be lazy                                              |  |  |  |  |  |
| 86  | Worry about damage to my hymen or sexual impotence           |  |  |  |  |  |
| 87  | Feel others are hostile towards me                           |  |  |  |  |  |
| 88  | Doubt my own abilities                                       |  |  |  |  |  |
| 89  | Feel there is no one I can trust                             |  |  |  |  |  |
| 90  | Resent insults from others                                   |  |  |  |  |  |
| 91  | Feel others' kindness has ulterior motives                   |  |  |  |  |  |
| 92  | Feel my achievements are not properly recognized             |  |  |  |  |  |
| 93  | Overly concerned with others' reactions to me                |  |  |  |  |  |
| 94  | Unwilling to listen to others' opinions                      |  |  |  |  |  |
| 95  | Get angry when my daily routine is disrupted                 |  |  |  |  |  |
| 96  | Must do things very slowly to ensure they are done correctly |  |  |  |  |  |
| 97  | Sexual fantasies prevent me from concentrating on studies    |  |  |  |  |  |
| 98  | Feel hopeless about the future                               |  |  |  |  |  |
| 99  | Can't help but criticize people or things I dislike          |  |  |  |  |  |
| 100 | Feel oppressed                                               |  |  |  |  |  |
| 101 | Fear public speaking                                         |  |  |  |  |  |
| 102 | Overly worried about trivial matters                         |  |  |  |  |  |
| 103 | Feel someone is trying to persecute me                       |  |  |  |  |  |
| 104 | Feel that wet dreams (or menstruation) are dirty             |  |  |  |  |  |
